# Supplementary material for: Annual (2023) taxonomic update of RNA-directed RNA polymerase-encoding negative-sense RNA viruses (realm Riboviria: kingdom Orthornavirae: phylum Negarnaviricota)
Source: J Gen Virol. 2023 Aug 25;104(8):001864. doi: 10.1099/jgv.0.001864 (PMC10721048; doi:10.1099/jgv.0.001864)
Supplement: Supplementary material 1 [file jgv-104-1864-s001.pdf]

Kuhn JH *et al.* (2023) 2023 taxonomic update of phylum *Negarnaviricota* (*Riboviria*: *Orthornavirae*), including the large orders *Bunyavirales* and *Mononegavirales*.

---

---

—

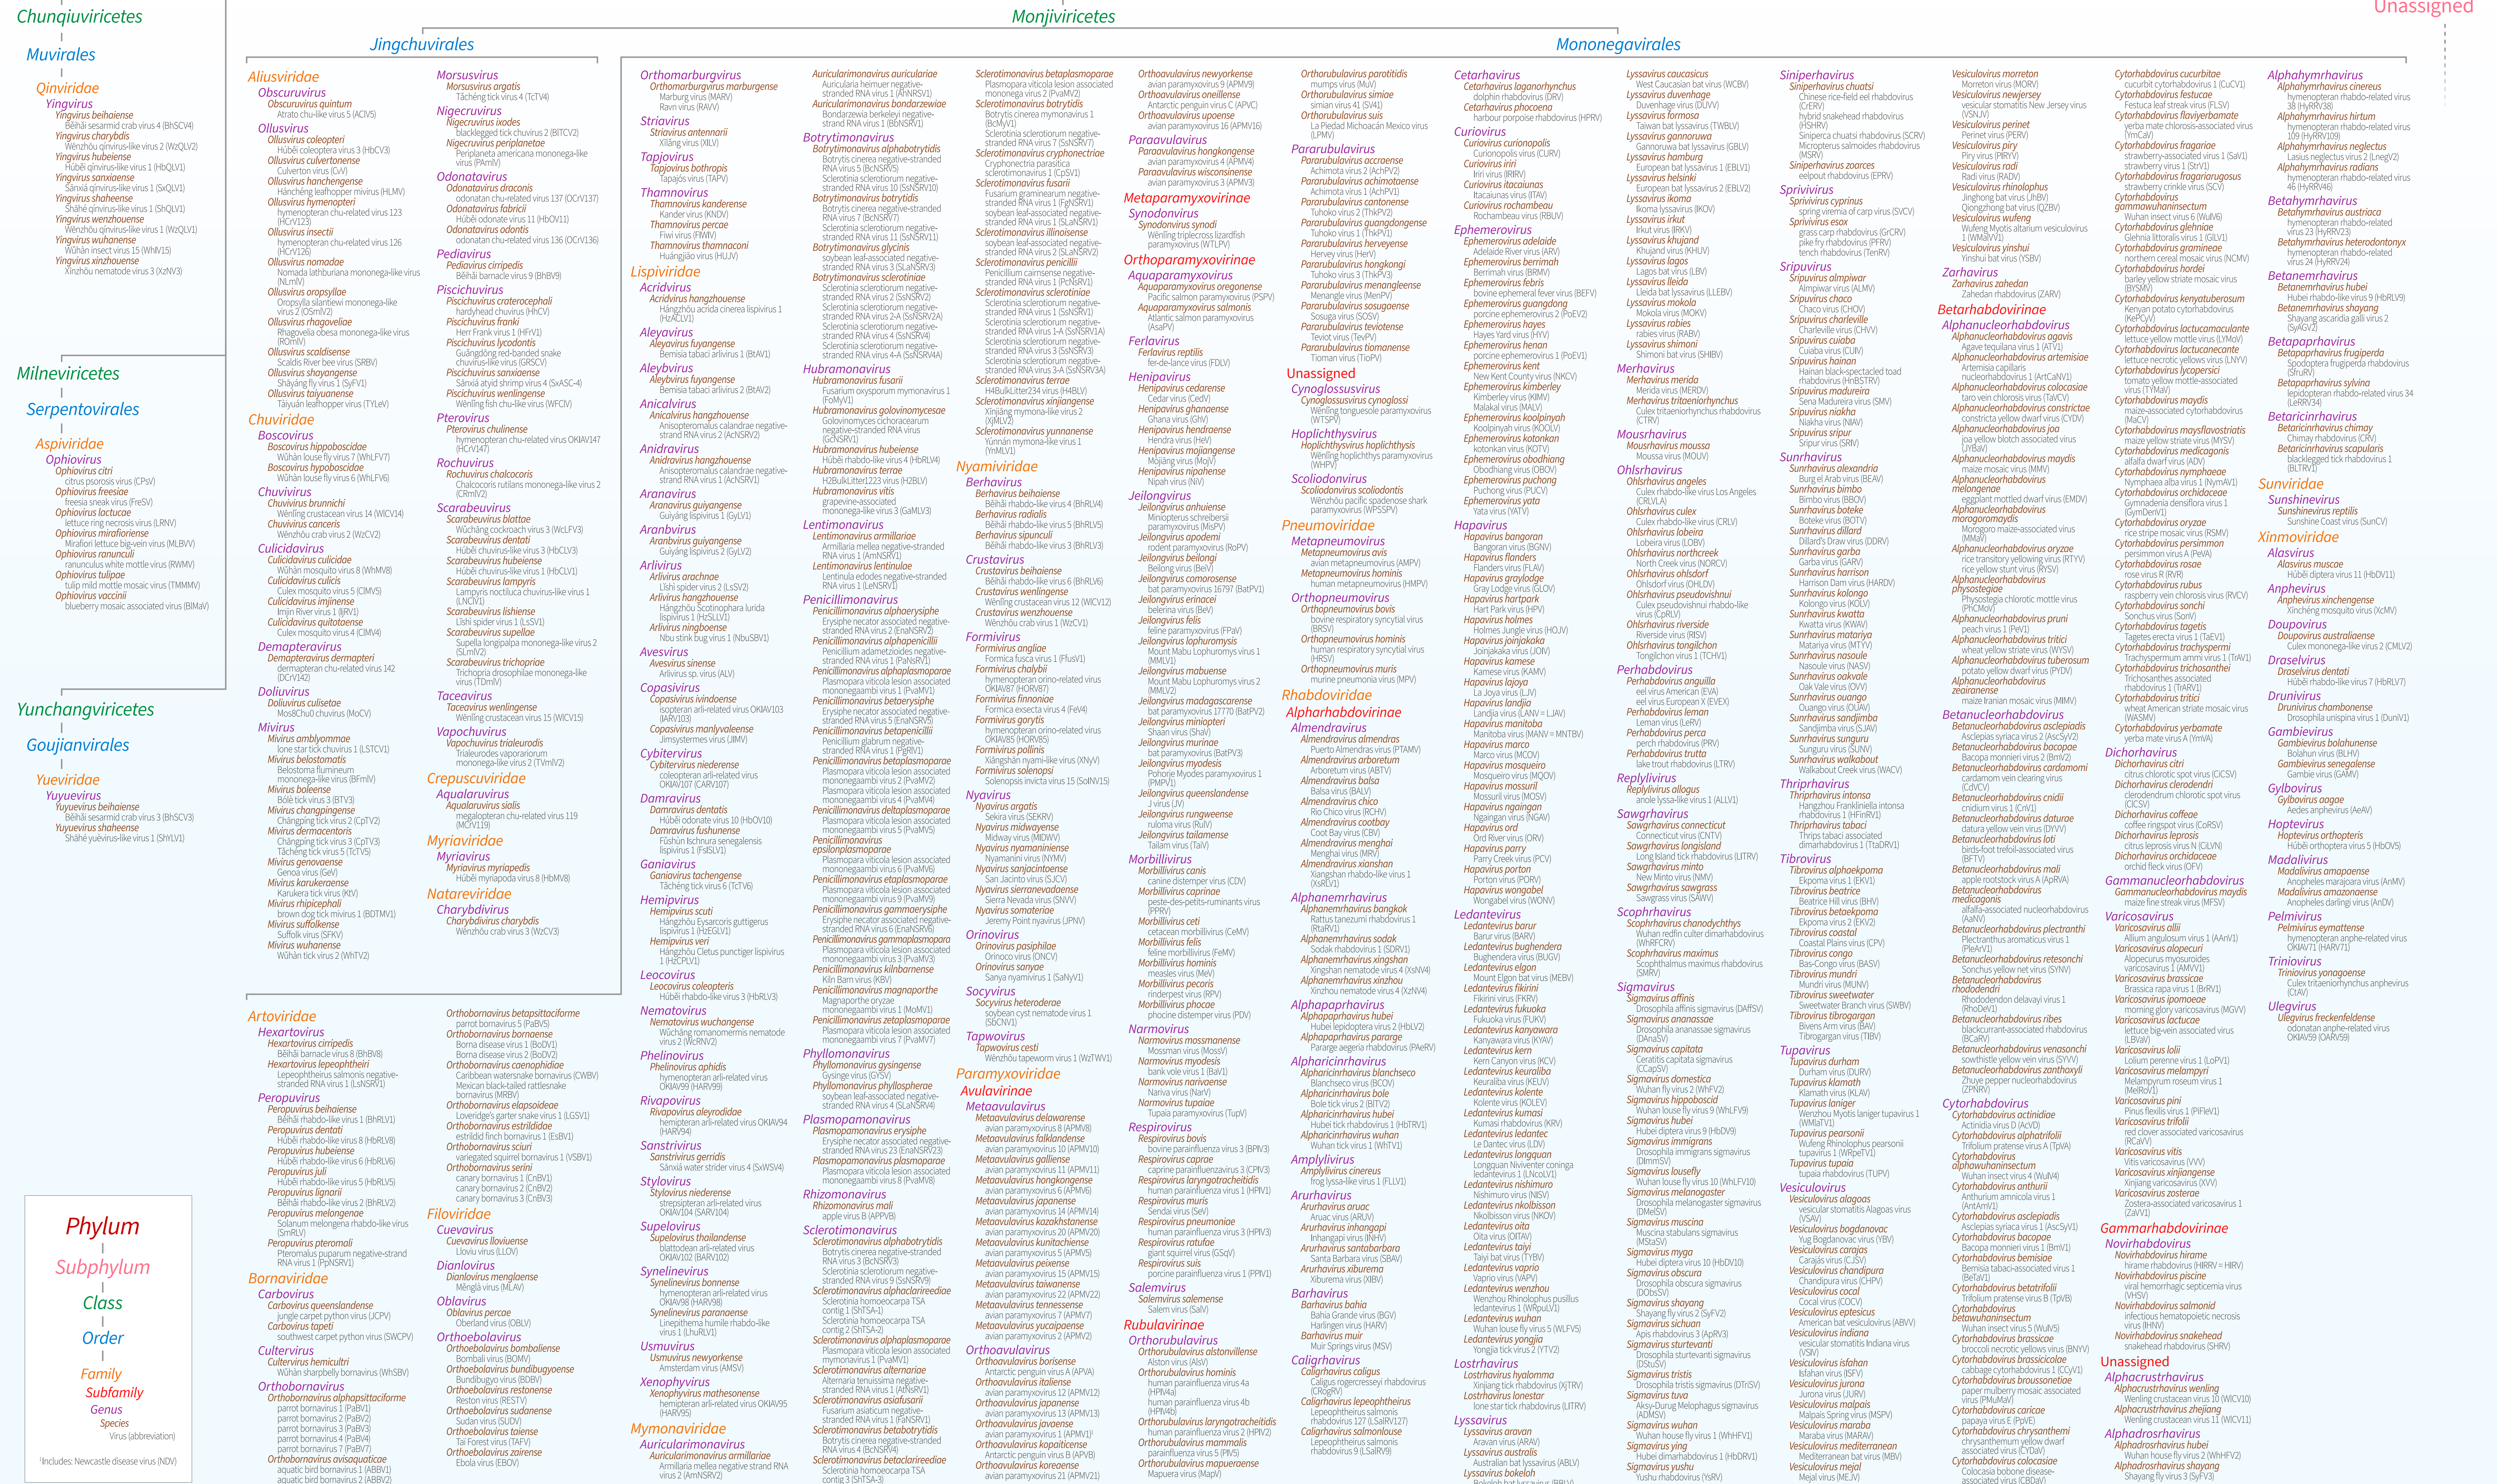

Kuhn JH *et al.* (2023) 2023 taxonomic update of phylum *Negarnaviricota* (*Riboviria*: *Orthornavirae*), including the large orders *Bunyavirales* and *Mononegavirales*.

## Polyploviricotina

Unassigned

## Bunyavirales

## Articulavirales

*Haploviricotina*

A vertical diagram showing the taxonomic hierarchy. The levels are listed from top to bottom: Phylum (red), Subphylum (pink), Class (green), Order (blue), Family (orange), Subfamily (red), Genus (purple), and Species (black). Each level is connected to the one below it by a vertical line. At the bottom, the word "Species" is followed by "Virus (abbreviation)" in a smaller font.

```

graph TD
    Phylum --> Subphylum
    Subphylum --> Class
    Class --> Order
    Order --> Family
    Family --> Subfamily
    Subfamily --> Genus
    Genus --> Species
    Species --- Virus["Virus (abbreviation)"]
  
```
